# Supplementary material
Source: PubMed Central journal article supplement (PMC8351631)
Supplement: jb.00178-21-s0001.pdf [file jb.00178-21-s0001.pdf]

|      |                                                                                                    |                                                                              |
|------|----------------------------------------------------------------------------------------------------|------------------------------------------------------------------------------|
| SC29 | GcACCTTCTGGTTCAGGAAAGACAACCTTTATTAATGTACTCAGTTCGA                                                  | <i>vraF</i> -G40A,                                                           |
| SC30 | TGTCTTTCCTGAACCAGAAGGTGCCATGATTGATATAAACTCACCTTCAT                                                 | introduces point mutation in the Walker A motif to abrogate ATP binding      |
| SC31 | CGCGGATCCGAAGTCCGTCTATCTAAACATTTT                                                                  |                                                                              |
| SC32 | ACGCCCCGGGGACCTCTTTATAATTATAGTAATGTTC                                                              |                                                                              |
| SC33 | GGAGGATCCTAATAATTTTCGATGGTTTTGGTTT                                                                 | <i>graS</i> coding sequence,                                                 |
| SC34 | GAAGAATCCCAAATGACAATCTTGTCACCTTAGAC                                                                | GraS-T18 fusion                                                              |
| SC35 | GGAGGATCCtAACTTTAATGAAATTATCTTCAAA                                                                 | <i>vraG</i> coding sequence,                                                 |
| SC36 | GAAGAATTCTTATATCGAATGTTTAATTGTTCTTTT                                                               | T25-VraG fusion                                                              |
| SC37 | CAAAAAGCGGTCAAATTATACGGTGCGCCCCGTGATTTCAAACAATAA<br>GTATCATAAAAAATTTATTTGCTTTCAGGAAAATTTTCTGTATAAT | Generates upstream $\lambda$ -red integration target sequence and introduces |
| SC38 | CTAGAACTCCTCTCTCAAATTTATGAATCTATTATACAGAAAAATTTTCCT<br>GAAAGCAAA                                   | pN25 promoter upstream of NIH0514 75 <i>hsdMS</i> coding sequence            |
| SC39 | GATTCATAAATTTGAGAGAGGAGTTCTAGATGGCAACAATTGGATTTGAA<br>GAAAA                                        | NIH0514 75 <i>hsdMS</i> coding sequence and                                  |
| SC40 | GAAGCAGCTCCAGCCTACACATATTTAAATTGAAAGTTCATCCATATTCA<br>CC                                           | overlap for FRT-flanked Kanamycin cassette                                   |
| SC41 | GAGGTGAATATGGATGAACTTTCAATTTAA<br>ATATGTGTAGGCTGGAGCTGCTTCGAAGTT                                   | Generates FRT-                                                               |

|      |                                                                               |                                                                                                                            |
|------|-------------------------------------------------------------------------------|----------------------------------------------------------------------------------------------------------------------------|
| SC42 | AACTTCGAAGCAGCTCCAGCCTACACATATTTAAATTGAAAGTTCATCCA<br>TATTCACCTC              | flanked<br>Kanamycin<br>cassette<br>and<br>introduces<br>downstream<br>$\lambda$ -red<br>integration<br>target<br>sequence |
| SC43 | ATAACGTGGCTTTTTTTGGTAAGCAGAAAATAAGTCATTAGTGAAAATAT<br>GTCCATATGAATATCCTCCTTAG | Primer set<br>amplifies<br>fused<br>fragments<br>of $\lambda$ -red<br>integration<br>amplicon                              |
| SC44 | CAAAAAGCGGTCAAATTATACGGTG                                                     | Generates<br>complete<br>pKD46<br>fragment<br>for<br>Gibson<br>assembly                                                    |
| SC45 | ATAACGTGGCTTTTTTTGGTAAGC                                                      | <i>recA</i><br>coding<br>sequence<br>and native<br>promoter<br>from<br><i>E.coli</i><br>K12 for<br>Gibson<br>assembly      |
| SC46 | TTCGTTCCACTGAGCGTCA                                                           | <i>graS</i><br>upstream<br>region, in-<br>frame C-<br>terminal<br>HA-tag                                                   |
| SC47 | AACTCACGTTAAGGGATTTTGGT                                                       | <i>graS</i><br>downstream<br>region,<br>in-frame<br>C-<br>terminal<br>HA-tag                                               |
| SC48 | TGACGCTCAGTGGAACGAACACTTGATACTGTATGAGCATACA                                   | <i>vraG</i><br>upstream                                                                                                    |
| SC49 | ACCAAAATCCCTTAACGTGAGTTGCAAAGGGCCGCAGATG                                      |                                                                                                                            |
| SC50 | ACGCGGATCCGACATGGATAGTGCAATTGAAACCAAA                                         |                                                                                                                            |
| SC51 | AGCATAATCTGGAACATCATATGGATAAAATGACAATCTTGTCACCTTAG<br>ACAT                    |                                                                                                                            |
| SC52 | TATCCATATGATGTTCCAGATTATGCTTAAACGTGCGTTTTGTTACTTACT<br>A                      |                                                                                                                            |
| SC53 | ACGCCCCGGGTCCTACTTGTGAGCCTTCTTT                                               |                                                                                                                            |
| SC54 | ACGCGGATCCGCGGCGTTAAGTCGTAGT                                                  |                                                                                                                            |

|      |                                                            |                                                           |
|------|------------------------------------------------------------|-----------------------------------------------------------|
| SC55 | AGCATAATCTGGAACATCATATGGATAATTAAGTTCATAATTGATGCCA<br>C     | region, in-frame N-terminal HA-tag                        |
| SC56 | TATCCATATGATGTTCCAGATTATGCTGAAATTATCTTCAAAAACCTTAA<br>ACAA | <i>vraG</i> downstream region, in-frame N-terminal HA-tag |
| SC57 | GGAGGATCCCATTTGCAATCATGATATGCTTAG                          | Fuses promoter of <i>mprF</i> to coding sequence          |
| SC58 | TATTTTCTTTAATTAATTCTTCACCCATGTTTTCACTTCGATTCTAATTCAA<br>T  | of the mRuby fluorescent protein                          |
| SC59 | ATTGAATTAGAATCGAAGTGAAAACATGGGTGAAGAATTAATTAAGAA<br>AATA   |                                                           |
| SC60 | ACGCACGGTCGACTTTATATAATTCATCCATACCACCACC                   |                                                           |

Table S2. Complete strain and plasmid table

| Strain or plasmid     | Relevant genotype or description | Source     |
|-----------------------|----------------------------------|------------|
| <i>S. epidermidis</i> |                                  |            |
| NIH051475             |                                  | (1)        |
| ALC9220               | $\Delta$ <i>graS</i>             | This Study |
| ALC9221               | $\Delta$ <i>graS</i> WTR         | This Study |

|         |                                                                                                                                |            |
|---------|--------------------------------------------------------------------------------------------------------------------------------|------------|
| ALC9222 | $\Delta graS/pEPSA5::vraG$ , VraG is ectopically overexpressed in a $\Delta graS$ background by the inducible plasmid pEPSA5   | This Study |
| ALC9223 | $\Delta graS/pEPSA5::vraFG$ , VraFG is ectopically overexpressed in a $\Delta graS$ background by the inducible plasmid pEPSA5 | This Study |
| ALC9224 | $graS-IM^{MW2}$ , replaces NIH051475 GraS intramembrane regions with <i>S. aureus</i> MW2's                                    | This Study |
| ALC9225 | $\Delta EL::Alanine_9 graS$                                                                                                    | This Study |
| ALC9226 | $\Delta EL::AYEISVESV graS$                                                                                                    | This Study |
| ALC9227 | $\Delta EL::DYDFPIDSL graS$ , replaces NIH051475 9 residue extracellular loop with <i>S. aureus</i> MW2's                      | This Study |
| ALC9228 | $\Delta vraG$                                                                                                                  | This Study |
| ALC9229 | $\Delta vraG$ wild type revertant                                                                                              | This Study |
| ALC9230 | $\Delta EL vraG$                                                                                                               | This Study |
| ALC9231 | $\Delta EL vraG$ wild type revertant                                                                                           | This Study |

|         |                                                             |            |
|---------|-------------------------------------------------------------|------------|
| ALC9232 | $\Delta$ GL <i>vraG</i>                                     | This Study |
| ALC9233 | $\Delta$ GL <i>vraG</i> wild type revertant                 | This Study |
| ALC9234 | $\Delta$ GL:: <i>Gly</i> <sub>10</sub> <i>vraG</i>          | This Study |
| ALC9235 | <i>vraF</i> -G40A, Alanine point mutation in Walker A motif | This Study |
| ALC9236 | <i>vraF</i> -G40A wild type revertant                       | This Study |
| ALC9237 | NIH051475 with C-terminal HA tagged GraS                    | This Study |
| ALC9238 | NIH051475 with C-terminal HA tagged EL/DYDFPIDSLS GraS      | This Study |
| ALC9239 | NIH051475 with C-terminal HA tagged EL/ Alanine GraS        | This Study |
| ALC9240 | NIH051475 with N-terminal HA tagged VraG                    | This Study |
| ALC9241 | NIH051475 with N-terminal HA tagged $\Delta$ EL VraG        | This Study |
| ALC9242 | NIH051475 with N-terminal HA tagged $\Delta$ GL VraG        | This Study |

|                       |                                                                                                                                                              |            |
|-----------------------|--------------------------------------------------------------------------------------------------------------------------------------------------------------|------------|
| ALC9243               | NIH051475 with N-terminal HA tagged GL-Gly <sub>10</sub> VraG                                                                                                | This Study |
| <b><i>E. Coli</i></b> |                                                                                                                                                              |            |
| DC10B                 | mcrA, Δ(mrr-hsdRMS-mcrBC), φ80lacZΔM15, ΔlacX74, recA1, araD139, Δ(ara-leu)7697, galU, galK, rpsL, endA1, nupG, Δdcm                                         | (2)        |
| DTH1                  | F <sup>-</sup> , cya-854, ilv 691::Tn10, recA1, endA1, gyrA96 (Nal <sup>r</sup> ), thi1, hsdR17, spoT1, rfbD1, glnV44(AS)                                    | (3)        |
| C41(DE3)              | F <sup>-</sup> , ompT, gal, dcm, hsdSB(rB- mB-)(DE3)                                                                                                         | Lucigen    |
| SKC-N05               | DC10BΩP <sub>N25</sub> -hsdMS of NIH051475 integrated between the atpI and gidB genes                                                                        | This study |
| <b>Plasmids</b>       |                                                                                                                                                              |            |
| pSK236                | Shuttle plasmid; ColE1 <i>E. coli</i> origin and Amp <sup>r</sup> selection, pC194 staphylococci origin and Cm <sup>r</sup> selection                        | (4)        |
| pEPSA5                | Xylose inducible complementation vector; p15A <i>E. coli</i> origin and Amp <sup>r</sup> selection, pC194 staphylococci origin and Cm <sup>r</sup> selection | (5)        |
| pMAD                  | Allelic exchange vector; pBR322 <i>E. coli</i> origin with Amp <sup>r</sup> selection, pE194ts staphylococci origin with Erm <sup>r</sup> selection          | (6)        |
| pKD46                 | λ-red recombineering vector for targeted genetic alterations in <i>E. coli</i> ; repA101ts origin, Amp <sup>r</sup>                                          | (7)        |



|                 |                                                                                                      |            |
|-----------------|------------------------------------------------------------------------------------------------------|------------|
| pKD4            | Template plasmid for FRT flanked kanamycin cassette; Amp <sup>r</sup> and Kan <sup>r</sup>           | (7)        |
| pKD46'          | pKD46 harboring <i>E. coli</i> K12 <i>recA</i> coding sequence under native promoter                 | This study |
| pKT25           | BacTH vector for N-terminal T25 fusion; p15A origin, Kan <sup>r</sup>                                | Euromedex  |
| pUT18           | BacTH vector for C-terminal T18 fusion; ColE1 origin, Amp <sup>r</sup>                               | Euromedex  |
| pKT25-zip       | Contains T25 fused leucine zipper of GCN4                                                            | Euromedex  |
| pUT18C-zip      | Contains T18 fused leucine zipper of GCN4                                                            | Euromedex  |
| pEPSA5-vraG     | pEPSA5 harboring the coding sequence of <i>vraG</i> for overexpression                               | This study |
| pEPSA5-vraFG    | pEPSA5 harboring the coding sequence of <i>vraFG</i> for overexpression                              | This study |
| pMADgraS        | pMAD derivative for in-frame deletion of <i>graS</i>                                                 | This study |
| pMADvraG        | pMAD derivative for in-frame deletion of <i>vraG</i>                                                 | This study |
| pMADgraS-MW2 IM | pMAD derivative for replacement of NIH051475 GraS intramembrane segments with <i>S. aureus</i> MW2's | This study |

|                       |                                                                                         |            |
|-----------------------|-----------------------------------------------------------------------------------------|------------|
| pMAD-SAla             | pMAD derivative for GraS EL replacement with Alanines                                   | This study |
| pMAD1                 | pMAD derivative for EL/ AYEISVESV <i>graS</i>                                           | This study |
| pMAD9                 | pMAD derivative for EL/DYDFPIDSL <i>graS</i>                                            | This study |
| pMADvraG-EL           | pMAD derivative for in-frame deletion of VraG extracellular loop                        | This study |
| pMADvraG-GL           | pMAD derivative for in-frame deletion of VraG putative guard loop                       | This study |
| pMADGGly              | pMAD derivative for VraG putative GL replacement with Glycines                          | This study |
| pMADG40A              | pMAD derivative for introduction of alanine at residue 40 of VraF                       | This study |
| pMADgraS-WTR          | pMAD derivative to generate wild type revertants in <i>vraF</i> and <i>vraG</i> mutants | This study |
| pMADvraFG-WTR         | pMAD derivative to generate wild type revertants in the $\Delta$ <i>graS</i> mutant     | This study |
| pUT18- <i>graS</i>    | <i>graS</i> ORF cloned into pUT18                                                       | This study |
| pUT18- <i>graS</i> -9 | EL/DYDFPIDSL <i>graS</i> ORF cloned into pUT18                                          | This study |

|                |                                                        |            |
|----------------|--------------------------------------------------------|------------|
| pUT18-graS-3   | EL/ DYEASVESV <i>graS</i> ORF cloned into pUT18        | This study |
| pUT18-graS-1   | EL/ AYEISVESV <i>graS</i> ORF cloned into pUT18        | This study |
| pKT25-vraG     | <i>vraG</i> ORF cloned into pKT25                      | This study |
| pKT25-vraG-GL  | $\Delta$ GL <i>vraG</i> ORF cloned into pKT25          | This study |
| pKT25-vraG-EL  | $\Delta$ EL <i>vraG</i> ORF cloned into pKT25          | This study |
| pKT25-vraG-Gly | GL-Gly <sub>10</sub> <i>vraG</i> ORF cloned into pKT25 | This study |

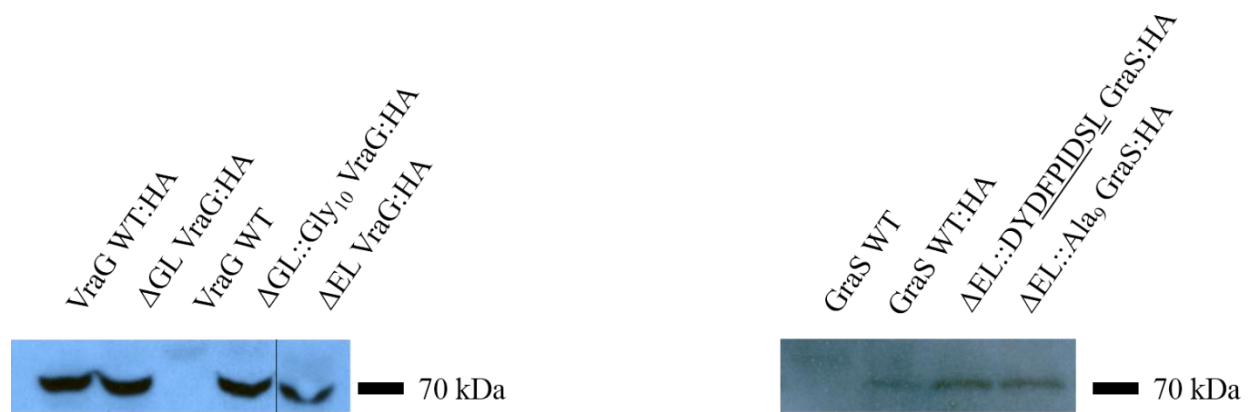

**Supplementary figure S1. Western blot validation of mutant GraS and VraG expression.**

HA-tagged alleles of indicated mutant VraG (N-terminal) or GraS (C-terminal) were chromosomally integrated via allelic exchange in the NIH051475 background. The predicted size for most VraG mutants is approximately 70 kDa while the *vraG*-ΔEL mutant is expected to be approximately 55 kDa. The expected size for monomeric GraS is approximately 35 kDa. Solid black line separating ΔGL::Gly<sub>10</sub> VraG:HA and ΔEL VraG:HA indicates removal of empty intervening lane.

**References**

1. Conlan S, Mijares LA, Becker J, Blakesley RW, Bouffard GG, Brooks S, Coleman H, Gupta J, Gurson N, Park M, Schmidt B, Thomas PJ, Otto M, Kong HH, Murray PR, Segre JA, NISC Comparative Sequencing Program. 2012. Staphylococcus epidermidis pan-genome sequence analysis reveals diversity of skin commensal and hospital infection-associated isolates. *Genome Biol* 13:R64.

2. Monk IR, Shah IM, Xu M, Tan M-W, Foster TJ. 2012. Transforming the Untransformable: Application of Direct Transformation To Manipulate Genetically *Staphylococcus aureus* and *Staphylococcus epidermidis*. *mBio* 3:e00277-11.
3. Dautin N, Karimova G, Ullmann A, Ladant D. 2000. Sensitive genetic screen for protease activity based on a cyclic AMP signaling cascade in *Escherichia coli*. *J Bacteriol* 182:7060–7066.
4. Mahmood R, Khan S. 1990. Role of upstream sequences in the expression of the staphylococcal enterotoxin B gene. *J Biol Chem* 265 8:4652–6.
5. Forsyth RA, Haselbeck RJ, Ohlsen KL, Yamamoto RT, Xu H, Trawick JD, Wall D, Wang L, Brown-Driver V, Froelich JM, C. KG, King P, McCarthy M, Malone C, Misiner B, Robbins D, Tan Z, Zhu Z, Carr G, Mosca DA, Zamudio C, Foulkes JG, Zyskind JW. 2002. A genome-wide strategy for the identification of essential genes in *Staphylococcus aureus*. *Mol Microbiol* 43:1387–1400.
6. Arnaud M, Chastanet A, Débarbouillé M. 2004. New Vector for Efficient Allelic Replacement in Naturally Nontransformable, Low-GC-Content, Gram-Positive Bacteria. *Appl Environ Microbiol* 70:6887.
7. Datsenko KA, Wanner BL. 2000. One-step inactivation of chromosomal genes in *Escherichia coli* K-12 using PCR products. *Proc Natl Acad Sci* 97:6640.
